# Supplementary material for: Lp-PLA2 silencing ameliorates inflammation and autophagy in nonalcoholic steatohepatitis through inhibiting the JAK2/STAT3 pathway
Source: PeerJ journal article supplement (doi:10.7717/peerj.15639), 2023-06-26

Figure 3B

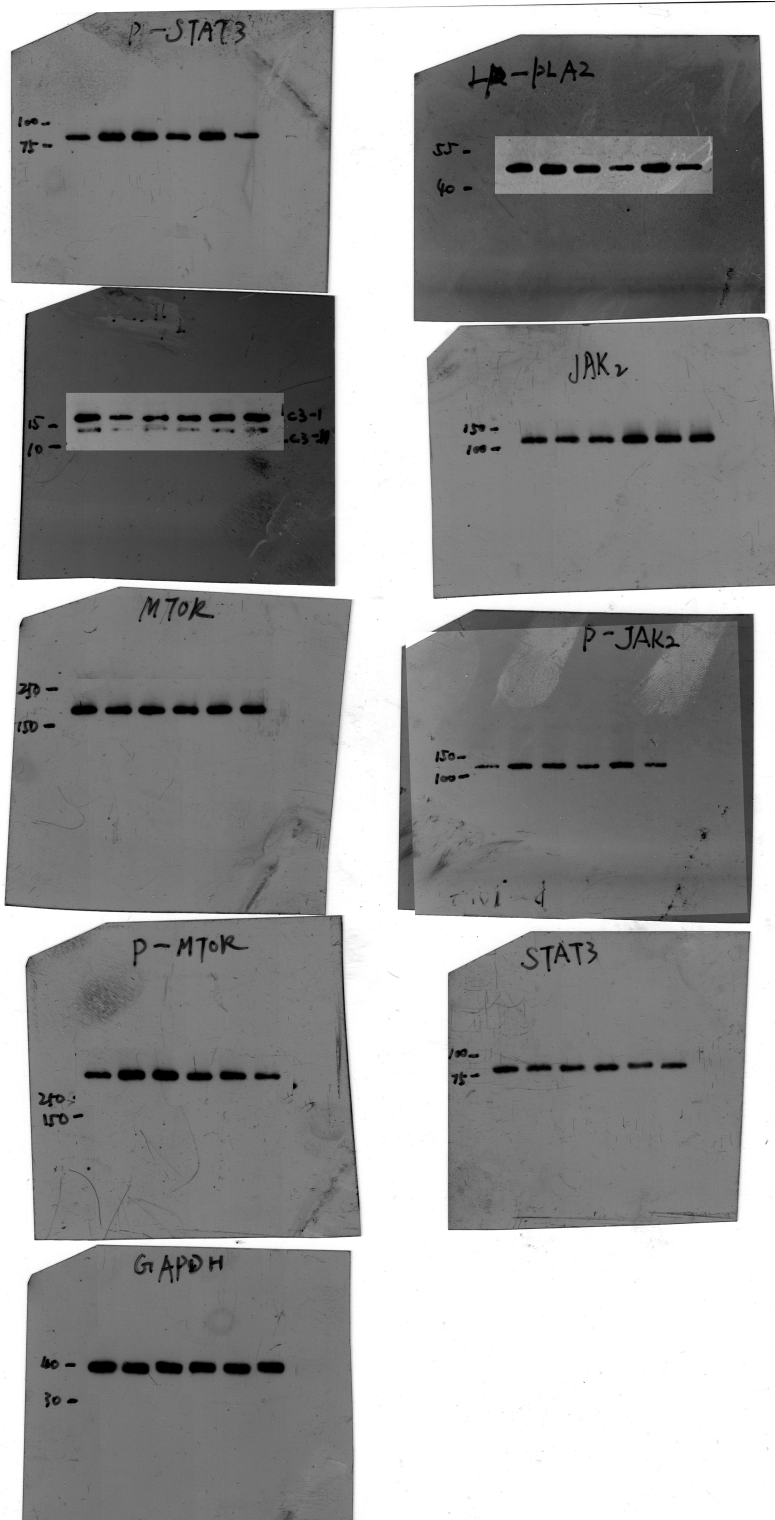

Figure 4B

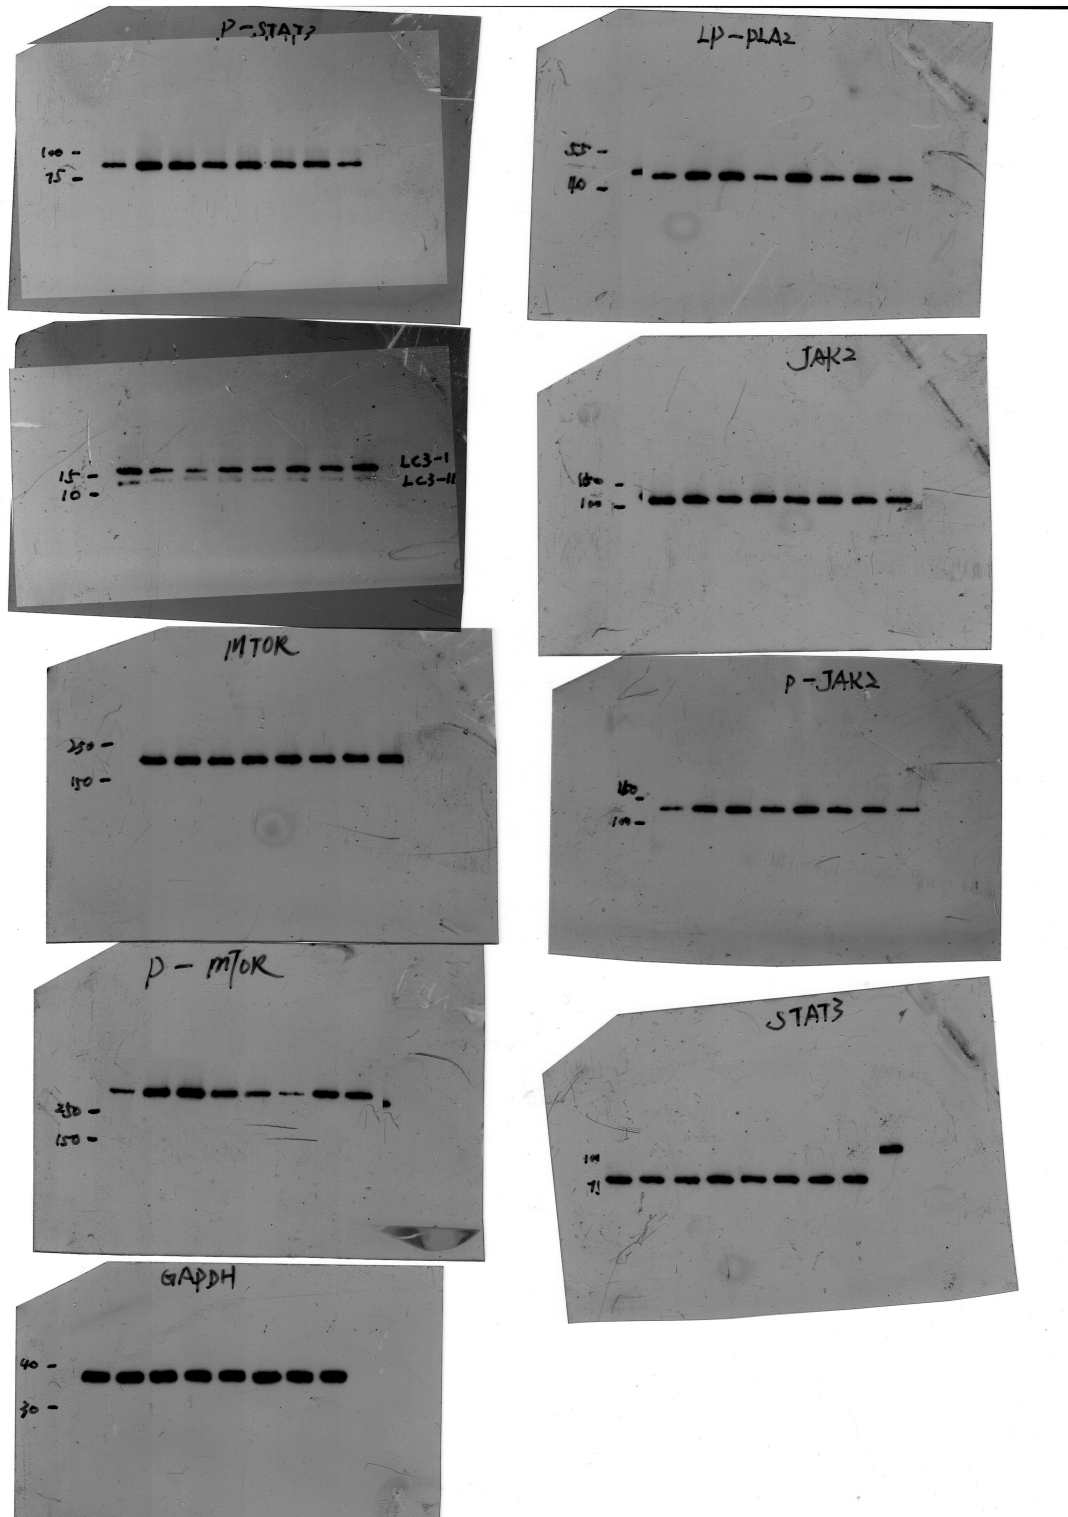

Supplement: original_images_of_Western_blot.pdf [file original_images_of_Western_blot.pdf]
